# Supplementary material for: The deubiquitinase Usp27x as a novel regulator of cFLIPL protein expression and sensitizer to death-receptor-induced apoptosis
Source: Apoptosis. 2022 Jan 19;27(1-2):112–32. doi: 10.1007/s10495-021-01706-9 (PMC8863773; doi:10.1007/s10495-021-01706-9)
Supplement: Supplementary file 1 — Supplementary Material 1 (12258 KB) [file 10495_2021_1706_MOESM1_ESM.pdf]

# **The deubiquitinase Usp27x as a novel regulator of cFLIP<sub>L</sub> protein expression and sensitizer to death-receptor-induced apoptosis**

Manuel Nico Dold<sup>1</sup>, Xiulin Ng<sup>1</sup>, Claudia Alber<sup>1</sup>, Ian Edward Gentle<sup>1</sup>, Georg Häcker<sup>1, 2</sup> and Arnim Weber<sup>1,\*</sup>

<sup>1</sup> Faculty of Medicine, Institute of Medical Microbiology and Hygiene, Medical Center, University of Freiburg, Freiburg, Germany.

<sup>2</sup> BIOS Centre for Biological Signalling Studies, University of Freiburg, Freiburg, Germany.

\*Corresponding author

E-mail: [arnim.weber@uniklinik-freiburg.de](mailto:arnim.weber@uniklinik-freiburg.de)

## **Contains:**

**Supplementary Fig. S1-S7**

**Supplementary Fig. Legends S1-S7**

**References for Suppl. Fig. Legends S1-S7**

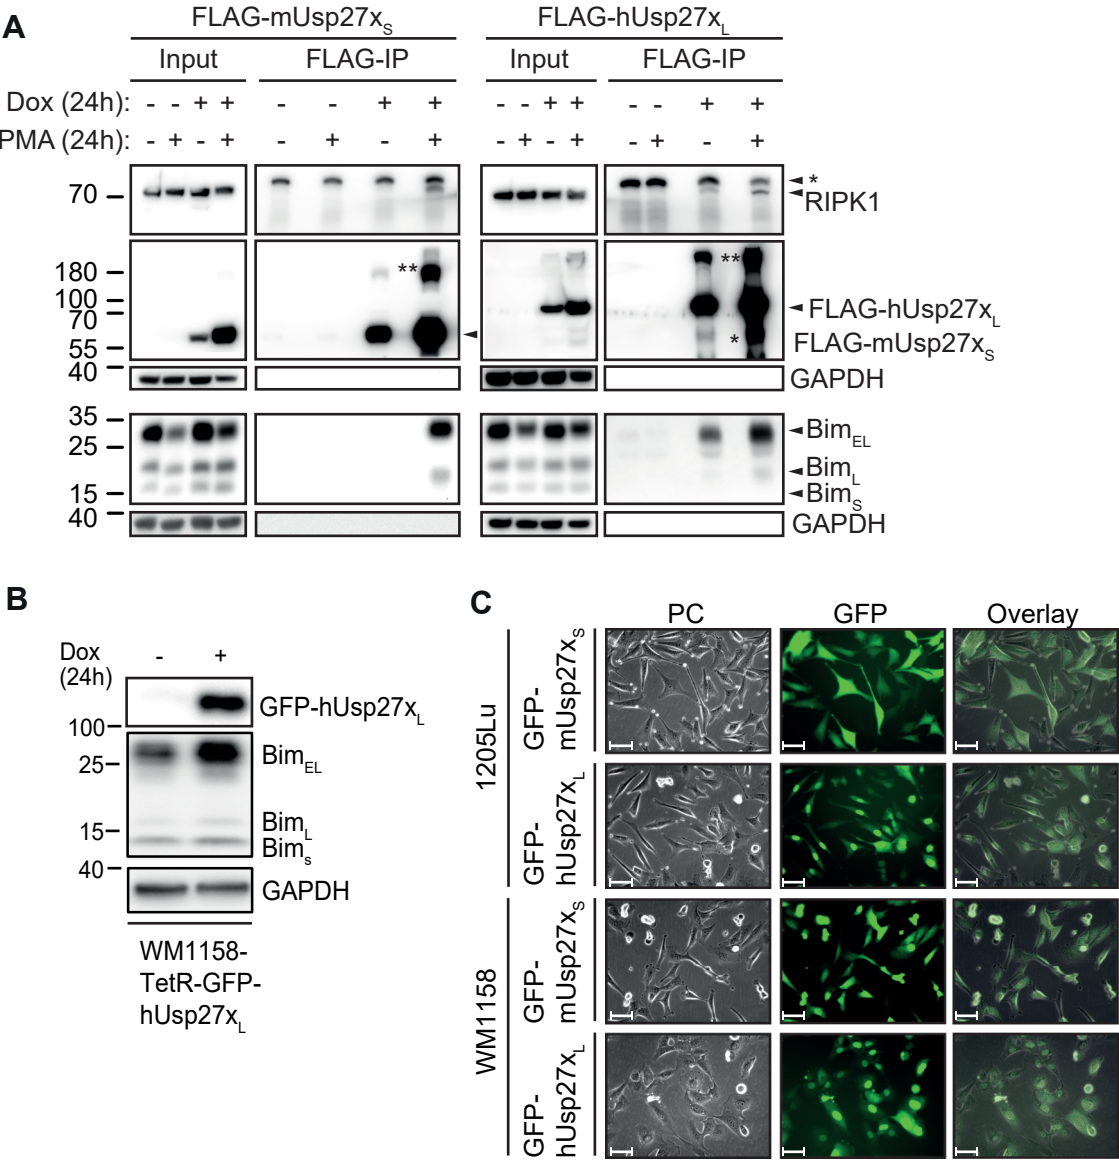

Suppl. Fig. 2

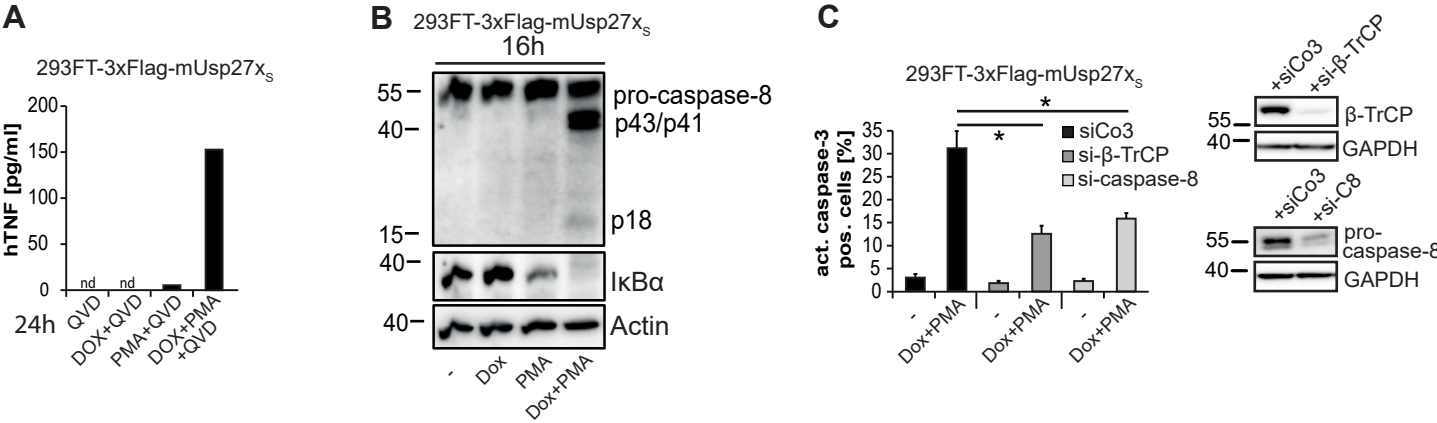

**A**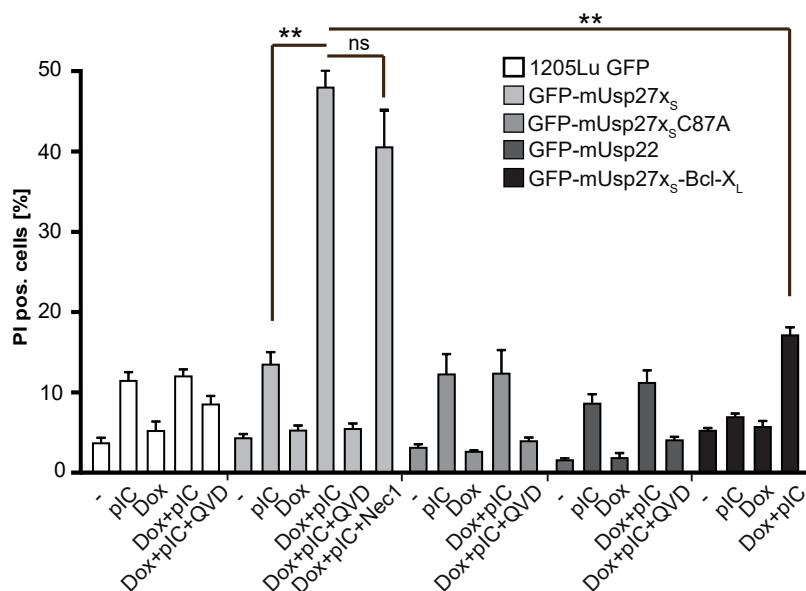**B**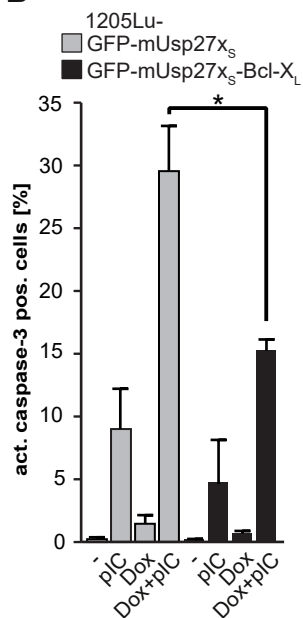**C**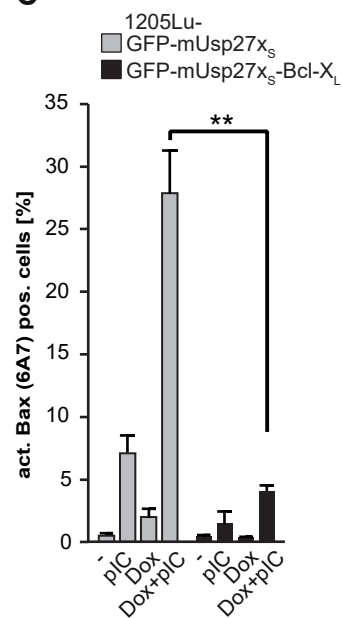**E**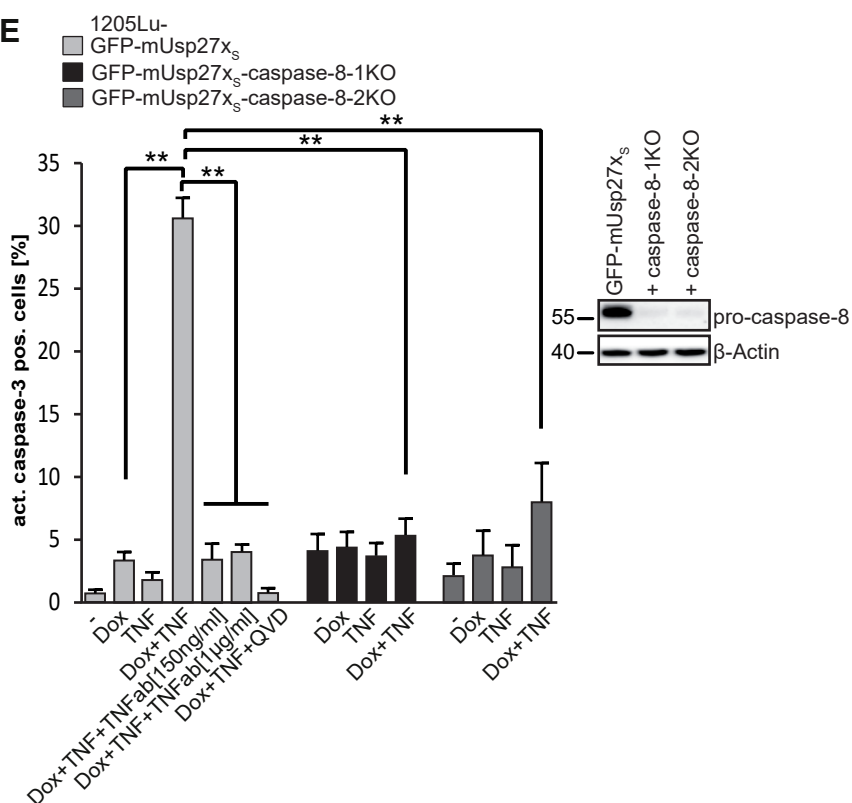**D**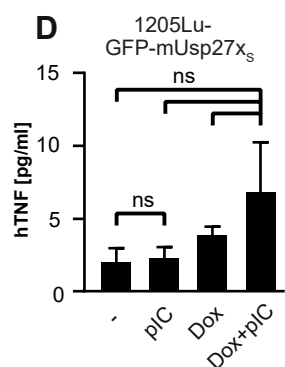**F**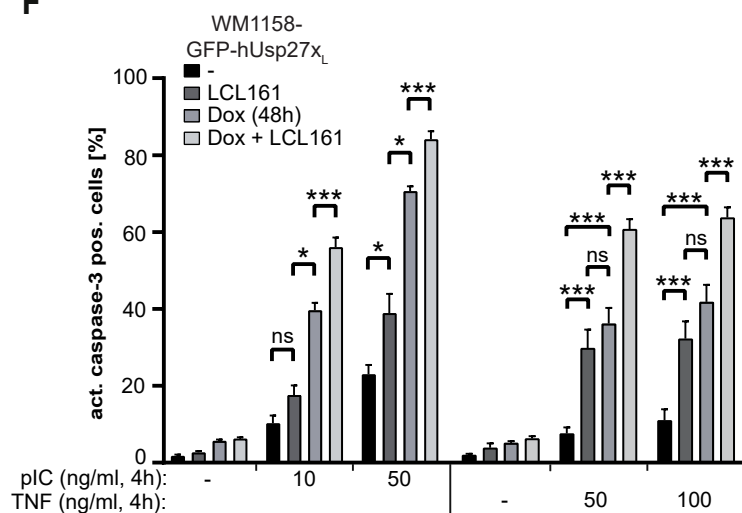

**A**

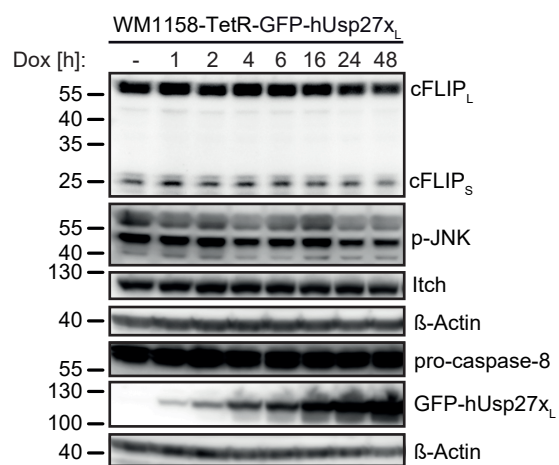

**B**

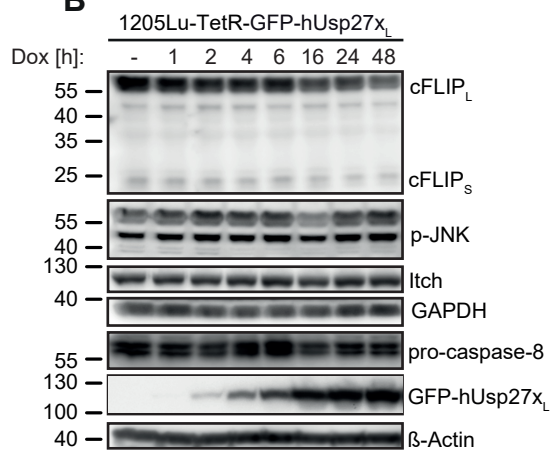

Suppl. Fig. S5

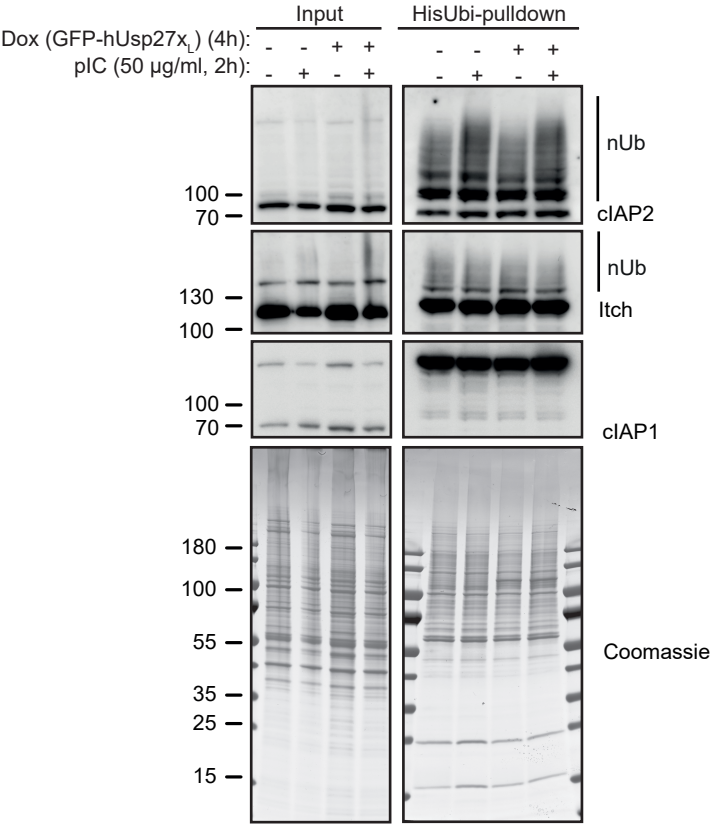

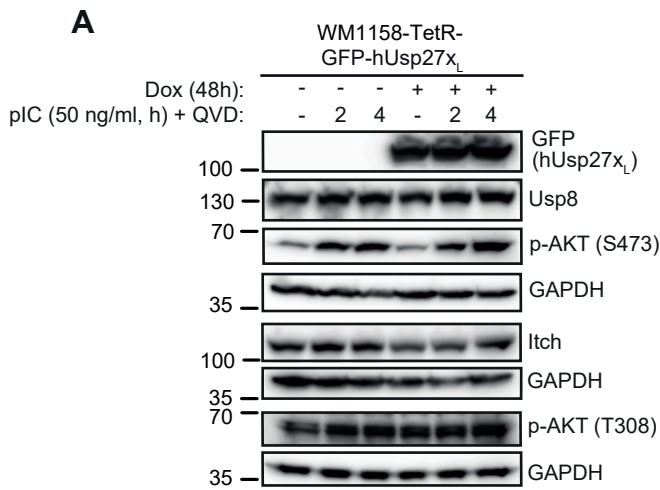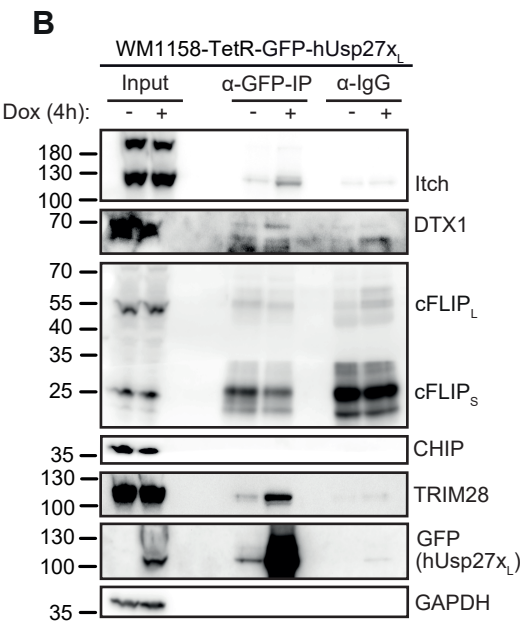

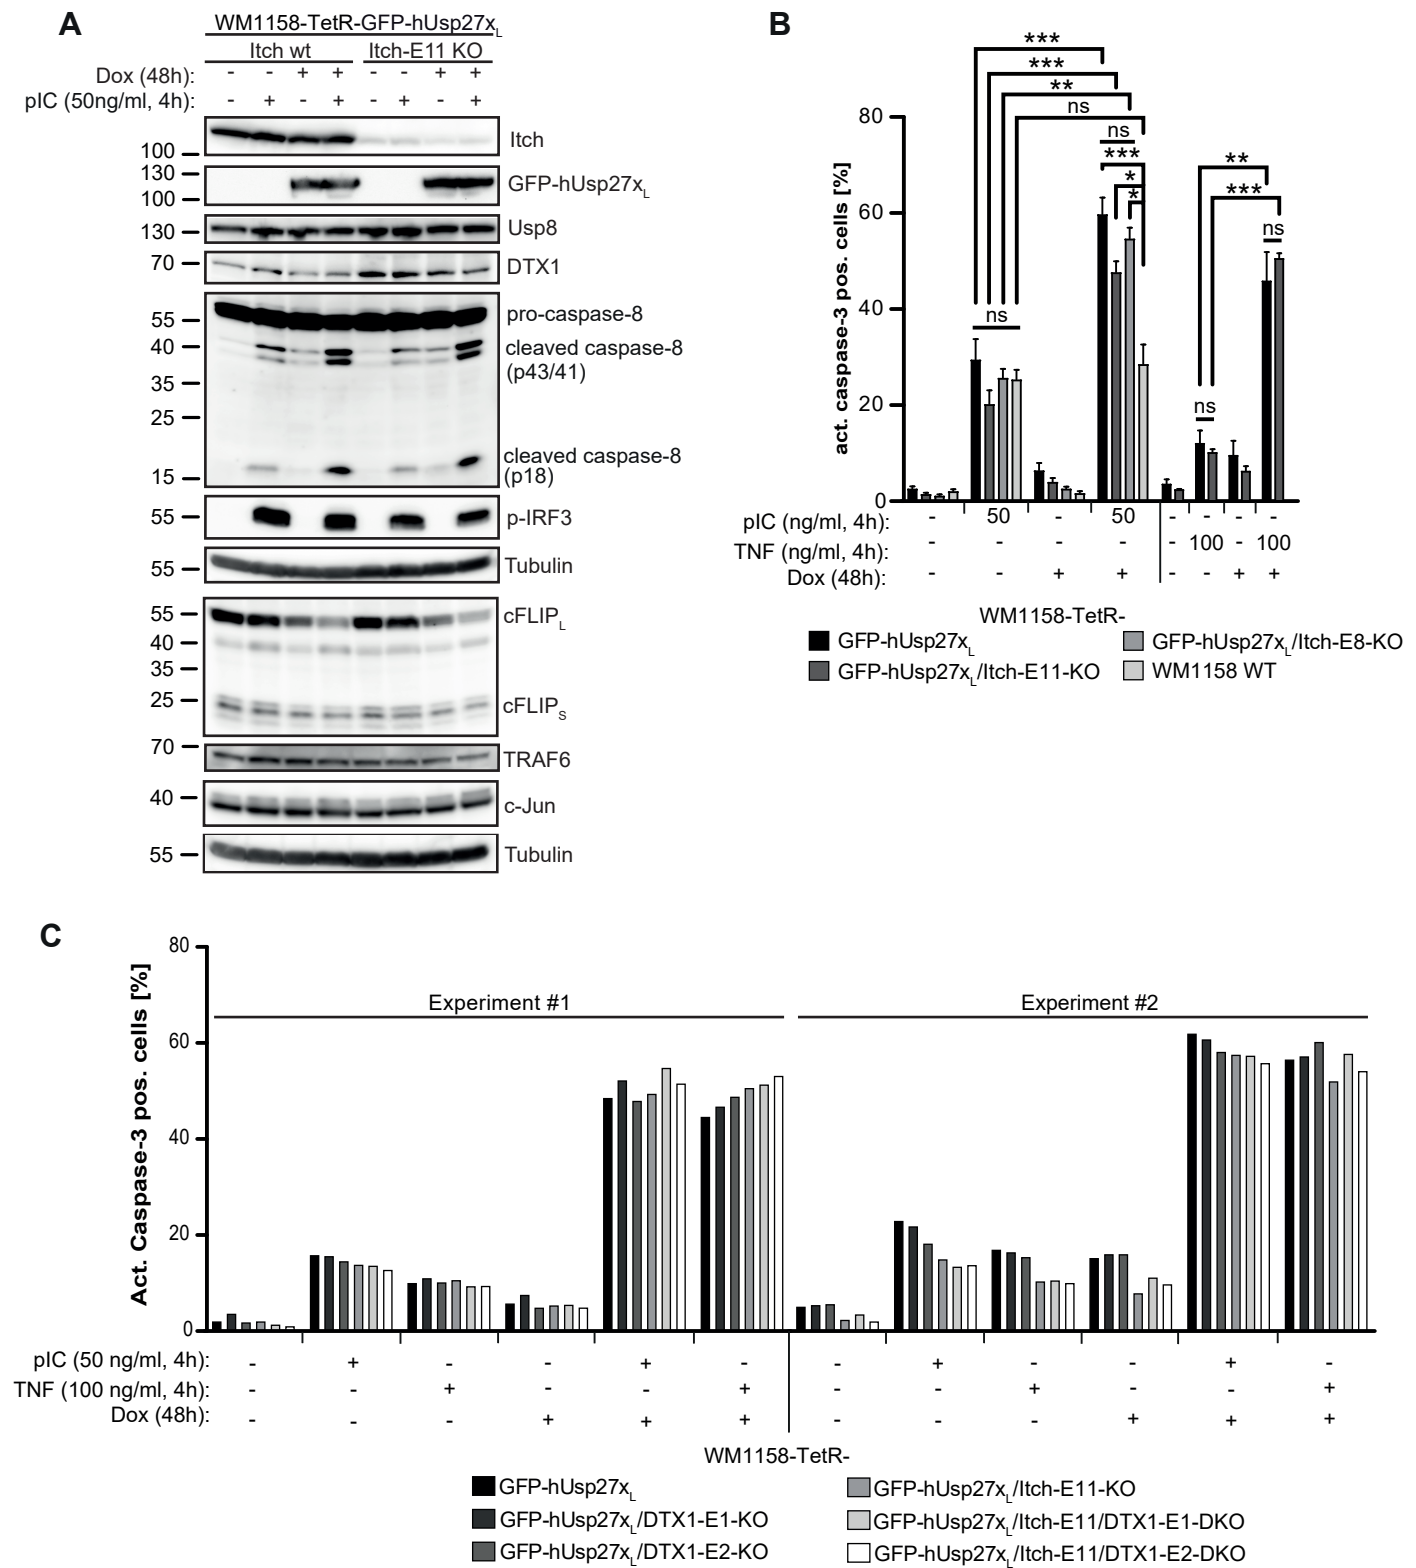

## Supplementary figure legends

### Supplementary Fig. S1: Interaction of Usp27x with Bim and subcellular localisation of human and mouse Usp27x variants

**A**, Both, mUsp27xs and hUsp27xL bind Bim and protect Bim from ERK dependent degradation. 3xFlag-Usp27x doxycycline inducible 293FT cells were treated with 16.2 nM PMA to activate the Raf-ERK-pathway dependent degradation of Bim (10 $\mu$ M QVD was added to block apoptosis). Flag-tagged beads were used in IP to pull down Usp27x from DISC-lysates. Co-immunoprecipitated proteins were detected by Western blot. Arrow-heads indicate specific signal for RIPK1, and Usp27x. Arrow-head labelled with an asterisk: cross reactive band of unknown origin. Double asterisks (\*\*) indicates a probable modified form of wild-type 3xFlag-Usp27x described before (1). The asterisk (\*) indicates a probable degradation product of 3xFlag-Usp27x (1) (n=3). **B**, hUsp27xL can counter Bim destabilization through the Raf-ERK pathway in BRAF-V600E-positive WM1158 cells as described before for mUsp27xs (1). GFP-hUsp27xL, was induced with dox for 24. Levels of Bim were determined by Western blotting. GFP-Usp27x expression was detected using an antibody against GFP (n=3). **C**, Subcellular localization of GFP-fused human and mouse Usp27x variants. GFP-hUsp27xL and GFP-mUsp27xs doxycycline inducible human melanoma cell lines were treated 24 h with Dox for expression. Overexpressed GFP-Usp27x fusion-protein was detected by fluorescence microscopy. GFP fluorescence was found both in the nucleus and the cytosol for both proteins. (PC: "phase-contrast", n=3; indicated scale bar 50  $\mu$ m).

### Supplementary Fig. S2: Usp27x expression leads to TNF production and caspase-8 dependent apoptosis in 293FT cells when stimulated with PMA

**A**, Overexpression of murine Usp27x (1) together with PMA treatment leads to secretion of TNF in 293FT-TetR-3xFlag-mUsp27xs cells. TNF-ELISA of 3xFlag-mUsp27xs doxycycline (Dox) inducible 293FT cells treated 24 h with or without Dox and/or PMA [16.2 nM] in the presence of 10  $\mu$ M QVD (n=1). **B**, Overexpression of 3xFlag-mUsp27xs together with PMA treatment leads to activation of caspase-8. Western blot of 3xFlag-Usp27xs doxycycline (Dox) inducible 293FT cells treated 16 h with or without Dox and/or PMA [16.2 nM] in the presence of QVD [10 $\mu$ M]. Cells were lysed in Laemmli buffer (n=3). **C**, Knockdown of human caspase-8 or  $\beta$ -TrCP in same inducible 293FT cells leads to protection against PMA-induced apoptosis upon overexpression of mUsp27xs. Inducible 293FT cells were transiently transfected for 48 h with control siRNA Co3 (n=5) or with siRNA against caspase-8 (si-C8, n=3) or  $\beta$ -TrCP (n=5). Subsequently, the transfected cells were treated with solvent control (-) or stimulated with 16.2 nM PMA and Dox for 24 h. Cells were harvested, fixed and stained for active caspase-3 followed by FACS analyses. The knock-down efficiency after siRNA (48 h) is shown in the figure to the right. **C**, Data (means, ns: not significant (adjusted p value > 0.05)). Error bars represent SEM. \*: significant, see materials and methods section

### Supplementary Fig. S3: mUsp27xs sensitizes 1205Lu melanoma cells to pIC- and TNF-induced apoptosis

**A-C**, mUsp27xs sensitizes 1205Lu melanoma cells to apoptosis induction by pIC. 1205Lu cell lines inducible expressing the indicated proteins were stimulated as indicated for 72 h. QVD [10 $\mu$ M] or Nec1 [10 $\mu$ M] were added 30 min before addition of other stimuli. pIC [50 $\mu$ g/ml]. Cell death/apoptosis was measured by propidium iodide (PI) added immediately prior to analysis by flow cytometry (**A**, GFP, n=3; GFP-mUsp27xs, n=4; GFP-mUsp27xsC87A, n=4; GFP-mUsp22, n=3; GFP-mUsp27xs-Bcl-XL, n=4), staining for active caspase-3 (**B**, n=3) or staining for active Bax (**C**, GFP-mUsp27xs, n=4; GFP-mUsp27xs-Bcl-XL, n=3). **D**, 1205Lu do

not secrete TNF upon pIC treatment and Usp27x overexpression does not alter the secretion. GFP-mUsp27xs doxycycline-inducible 1205Lu were treated as indicated for 72h in presence of 10  $\mu$ M QVD. Supernatants of samples were harvested and TNF concentrations were determined by ELISA. Error bars represent SEM; detection limit according to manufactures protocol: 2 pg/ml; ns: not significant (adjusted p value > 0.05); (n=3 for untreated, n=4 for pIC/ Dox or Dox + pIC treated samples). **E**, Deletion of caspase-8 prevents apoptosis induced by TNF + Usp27x expression. GFP-mUsp27xs inducible 1205Lu cells or two polyclonal cell lines deficient for caspase-8 (caspase-8-1KO and caspase-8-2KO, the knock-out efficiency is shown in the figure to the right) were treated 72 h with doxycycline (Dox) and/or TNF [100ng/ml], the indicated amount of neutralizing TNF antibody, or QVD [10 $\mu$ M]. Active caspase-3 as a marker for apoptosis was determined by flow cytometry (n=6). **F**, Apoptotic cell death of TNF and pIC treated, hUsp27xL over-expressing WM1158 melanoma cells is not restricted by cIAP1 or cIAP2. GFP-hUsp27xL doxycycline (Dox) inducible WM1158 cells were pre-stimulated 48 h  $\pm$  Dox. After that, indicated cells were pre-treated 30 min with 1  $\mu$ M LCL161 to deplete cIAPs. Afterwards pIC (left part) or TNF (right part) was added for 4 h. Active caspase-3 was determined by flow cytometry (n=3 for pIC; n=4 for TNF). **A-C, E, F**, Data (means, ns: not significant (adjusted p value > 0.05)). Error bars represent SEM. \*, \*\*, \*\*\*: significant, adjusted p values, see materials and methods section.

#### **Supplementary Fig. S4: Induction of hUsp27xL in human melanoma cells leads to loss of cFLIP<sub>L</sub> protein**

**A, B**, cFLIP<sub>L</sub> protein levels are decreased after prolonged induction of hUsp27xL in WM1158 (**A**) and 1205Lu (**B**) melanoma cells. TetR-GFP-hUsp27xL WM1158 (**A**) and TetR-GFP-hUsp27xL 1205Lu cells (**B**) were treated as indicated and then lysed in urea lysis buffer. Western blot was performed to determine levels of cFLIP, GFP-Usp27xL, p-JNK, as well as total Itch or pro-caspase-8. (n=4 in total (3x for WM1158, once for 1205Lu)).

#### **Supplementary Fig. S5: Overexpression of hUsp27xL does not alter ubiquitination of cIAPs, Itch or total ubiquitination of proteins**

TetR-GFP-hUsp27xL WM1158 cells overexpressing His-ubiquitin were treated as indicated, lysed and Ni<sup>2+</sup>-NTA agarose beads were used to pull down His-ubiquitin labelled proteins (HisUbi-pulldown). Purified proteins were loaded alongside input samples (whole-cell-lysate) on SDS-gels to perform Western blot or Coomassie-stain (total ubiquitination). Data show one representative experiment (n=3).

#### **Supplementary Fig. S6: Usp27xL does not target cFLIP<sub>L</sub> protein for degradation through AKT but Usp27x interacts with different E3-ubiquitin ligases**

**A**, Usp27xL induction in GFP-hUsp27xL doxycycline-inducible WM1158, does not change increased p-AKT levels upon pIC treatment and does not change Usp8 or Itch levels. Cells were pre-stimulated 48 h  $\pm$  Dox to induce Usp27xL and afterwards QVD [10 $\mu$ M]  $\pm$  pIC was added for the indicated time points (n=3). Of note for **A**: GFP (hUsp27xL) immunoblot is the same already shown in Fig. 4A. Usp8 and p-AKT (S473) were reprobbed on the same membrane used for caspase-8/GFP (Fig. 4A) and Itch was reprobbed on the same membrane used for cFLIP (Fig. 4A). **B**, hUsp27xL can interact with the E3 ligases Itch, DTX1 and Trim28. TetR-GFP-hUsp27xL WM1158 cells were treated as indicated and then lysed in DISC-lysis-buffer. Co-IP was performed using anti-GFP antibody to pull down GFP-tagged hUsp27xL. Interaction partners were determined by Western blot (n=3).

**Supplementary Fig. S7: Itch deficiency does not protect against hUsp27<sub>XL</sub>-dependent degradation of cFLIP<sub>L</sub>, hUsp27<sub>XL</sub>-enhanced caspase-8 processing under pIC treatment, and enhanced pIC- and TNF-induced apoptosis by hUsp27<sub>XL</sub> overexpression, but increases Itch substrate DTX1**

**A**, Itch deficiency does not protect against hUsp27<sub>XL</sub>-dependent degradation of cFLIP<sub>L</sub> and hUsp27<sub>XL</sub>-enhanced caspase-8 processing under pIC treatment but increases Itch-substrate DTX1. TetR-GFP-hUsp27<sub>XL</sub> WM1158 or polyclonal Itch deficient (Itch-E11-KO) TetR-GFP-hUsp27<sub>XL</sub> WM1158 cells were pre-stimulated for 48 h with doxycycline (Dox) to induce Usp27<sub>XL</sub> followed by 4 h treatment with QVD [10μM] ± pIC and then lysed in urea lysis buffer. Proteins were detected by Western blot. Shown are the results of one experiment blotted on two membranes (n=2). **B**, Itch deficiency does not protect against hUsp27<sub>XL</sub>-enhanced apoptosis upon pIC or TNF treatment. For pIC treatment (left part), WM1158 wild-type, WM1158-TetR-GFP-hUsp27<sub>XL</sub>, and two polyclonal Itch-deficient (Itch-E11-KO and Itch-E8-KO) GFP-hUsp27<sub>XL</sub> inducible WM1158 cell lines were pre-stimulated 48 h with doxycycline (Dox) to induce Usp27<sub>XL</sub>. Afterwards pIC was added for 4 h. Active caspase-3 as a marker for apoptosis was determined by flow cytometry. Error bars represent SEM; ns: not significant (adjusted p value > 0.05); \*: adjusted p value < 0.05; \*\*: adjusted p value < 0.005; \*\*\*: adjusted p-value < 0.0005 (n=7 for TetR-GFP-hUsp27<sub>XL</sub> and Itch-E11 TetR-GFP-hUsp27<sub>XL</sub>, n=3 for Itch-E8 TetR-GFP-hUsp27<sub>XL</sub>, n=6 for WT). For TNF treatment (right part), WM1158-TetR-GFP-hUsp27<sub>XL</sub> and one polyclonal Itch-deficient (Itch-E11-KO) GFP-hUsp27<sub>XL</sub> inducible WM1158 cell line were again pre-stimulated 48 h with Dox to induce Usp27<sub>XL</sub> followed by stimulation with TNF for 4 h (n=3). **C**, Neither deletion of DTX1, nor deletion of DTX1 and Itch protects against hUsp27<sub>XL</sub>-enhanced apoptosis upon pIC or TNF treatment. Two polyclonal DTX1-deficient (DTX1-E1-KO and DTX1-E2-KO), one polyclonal Itch-deficient (Itch-E11-KO) and two double deficient (Itch-E11/DTX1-E1-DKO and Itch-E11-DTX1-E2-DKO) GFP-hUsp27<sub>XL</sub> inducible WM1158 cells were pre-stimulated 48 h with doxycycline to induce hUsp27<sub>XL</sub>. Afterwards pIC or TNF was added for 4 h. Active caspase-3 was determined by flow cytometry. Shown is the rate of active-caspase-3 positive cells of two independent experiments (left and right; n=2).

## References

1. Weber A, Heinlein M, Dengjel J, Alber C, Singh PK, Hacker G. (2016) The deubiquitinase Usp27x stabilizes the BH3-only protein Bim and enhances apoptosis. EMBO reports 17:724-738.
